# Supplementary material
Source: PubMed Central journal article supplement (PMC3434745)
Supplement: supp_194.13.3437_FigS1.pdf [file supp_194.13.3437_FigS1.pdf]

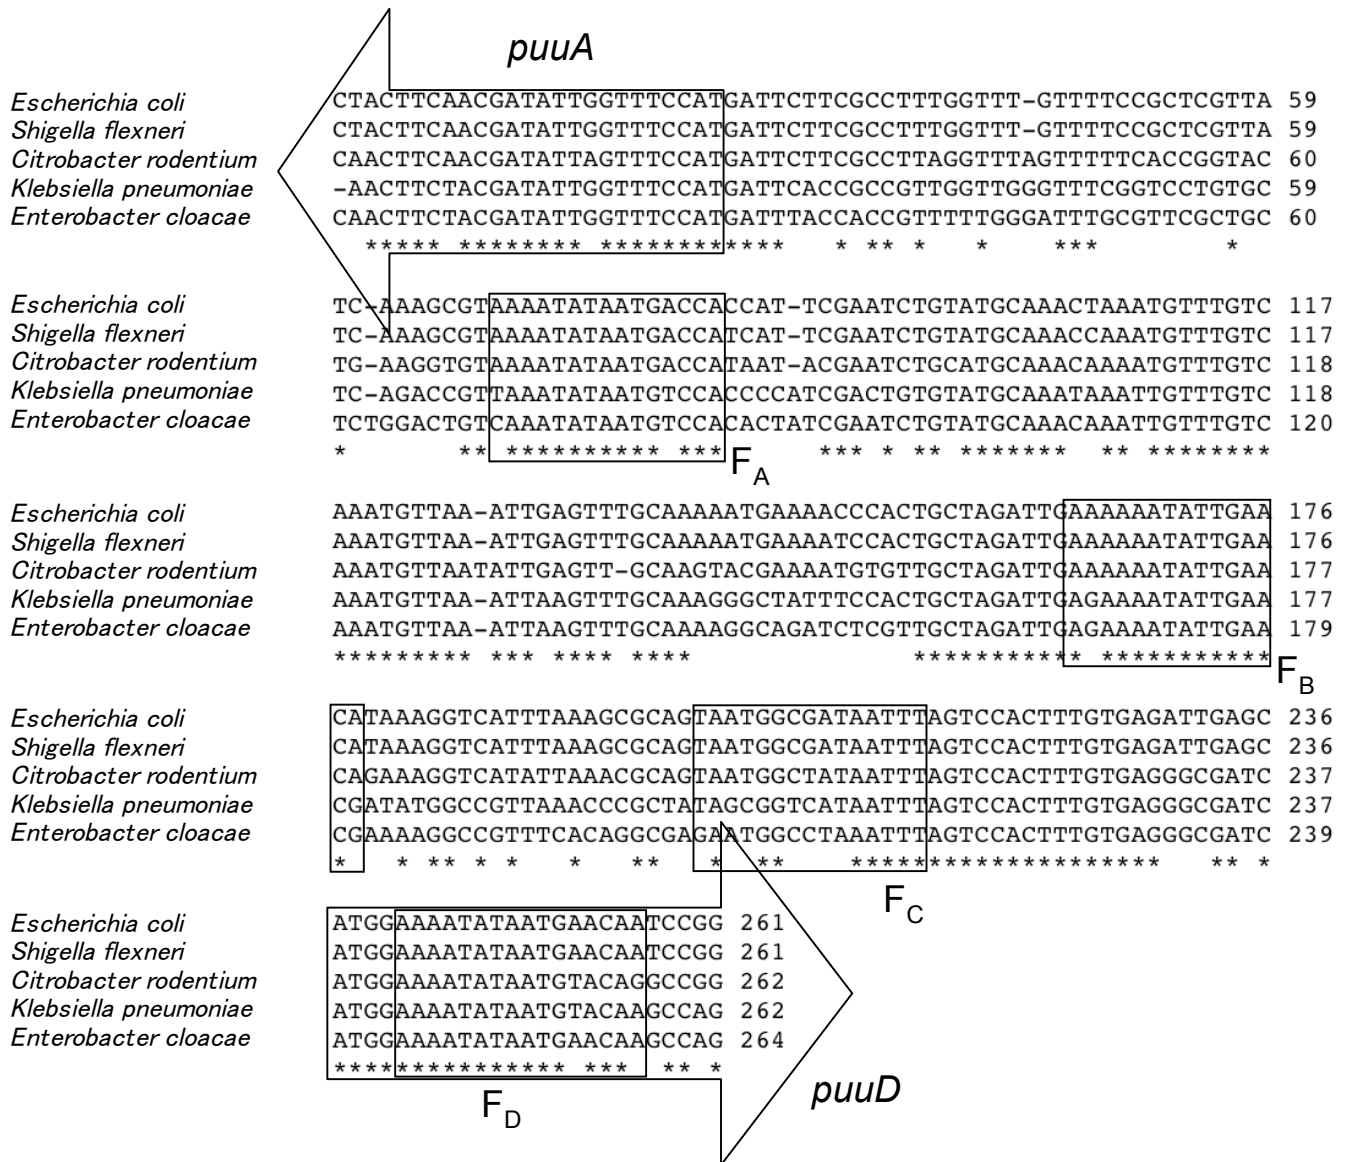

**Figure S1.** Alignment of the intergenic region between *puuA* and *puuD*. Alignment of the intergenic region between *puuA* and *puuD* in *Escherichia coli* str. K-12 substr. MG1655 (accession No. NC\_000913), *Shigella flexneri* 5 str. 8401 (accession No. CP000266), *Citrobacter rodentium* ICC168 (accession No. FN543502), *Klebsiella pneumoniae* 342 (accession No. CP000964), *Enterobacter cloacae* subsp. *cloacae* ATCC13047 (accession No. CP001918). ORFs of *puuA* and *puuD* are surrounded by clear arrows. Boxes mark the 15-bp PuuR-binding motifs in F<sub>A</sub>, F<sub>B</sub>, F<sub>C</sub>, and F<sub>D</sub>, as determined by DNase I footprint assays.
